# Supplementary material for: Rapid Detection of Thermal Treatment of Honey by Chemometrics-Assisted FTIR Spectroscopy
Source: MDPI journal article supplement (doi:10.3390/foods10112892), 2021-11-22
Supplement: s1 [file s1]

**Table S1**

HMF content in honey after heat treatment, measured by chromatography.

| Sample                   | Average HMF content<br>(mg/kg) | SD<br>(mg/kg) | RSD<br>(%) |
|--------------------------|--------------------------------|---------------|------------|
| Acacia RAW               | 9.43                           | 0.53          | 5.57       |
| Acacia 70°C, 15 min      | 8.48                           | 0.23          | 2.56       |
| Acacia 70°C, 120 min     | 10.6                           | 0.03          | 0.30       |
| Acacia 40°C, 3.5 h       | 12.85                          | 0.33          | 2.57       |
| Acacia 40°C, 24 h        | 10.00                          | 0.38          | 3.82       |
| Eucalyptus RAW           | 26.51                          | 0.87          | 3.29       |
| Eucalyptus 70°C, 15 min  | 28.33                          | 0.38          | 1.37       |
| Eucalyptus 70°C, 120 min | 28.73                          | 0.39          | 1.37       |
| Eucalyptus 40°C, 3.5 h   | 34.39                          | 0.47          | 1.38       |
| Eucalyptus 40°C, 24 h    | 37.26                          | 0.45          | 1.21       |
| Orange RAW               | 16.10                          | 0.64          | 4.025      |
| Orange 70°C, 15 min      | 16.31                          | 0.021         | 0.13       |
| Orange 70°C, 120 min     | 8.65                           | 0.11          | 1.28       |
| Orange 40°C, 3.5 h       | 16.19                          | 0.21          | 1.34       |
| Orange 40°C, 24 h        | 16.43                          | 0.22          | 1.34       |

SD - standard deviation, RSD - relative standard deviation

**Table S2**

Fructose, glucose, and sucrose concentrations in different types of honey, measured by chromatography.

| Sample               | Fructose<br>concentration $\pm$ SD<br>(%) | Glucose<br>Concentration $\pm$ SD<br>(%) | Sucrose<br>Concentration $\pm$ SD<br>(%) |
|----------------------|-------------------------------------------|------------------------------------------|------------------------------------------|
| Acacia RAW           | 32.45 $\pm$ 0.14                          | 20.91 $\pm$ 3.025                        | 0.33 $\pm$ 0.0031                        |
| Acacia 70°C, 15 min  | 36.47 $\pm$ 0.057                         | 21.03 $\pm$ 0.003                        | 0.39 $\pm$ 0.015                         |
| Acacia 70°C, 120 min | 37.64 $\pm$ 0.084                         | 21.67 $\pm$ 0.011                        | 0.35 $\pm$ 0.017                         |

|                          |               |               |               |
|--------------------------|---------------|---------------|---------------|
| Acacia 40°C, 3.5 h       | 38.37 ± 0.105 | 22.28 ± 0.019 | 0.32 ± 0.0011 |
| Acacia 40°C, 24 h        | 38.26 ± 0.16  | 22.61 ± 0.603 | 0.32 ± 0.0061 |
| Eucalyptus RAW           | 38.54 ± 1.19  | 21.33 ± 0.66  | 0.14 ± 0.012  |
| Eucalyptus 70°C, 15 min  | 33.39 ± 0.051 | 29.57 ± 3.71  | 0.13 ± 0.0091 |
| Eucalyptus 70°C, 120 min | 36.07 ± 3.51  | 27.11 ± 0.61  | 0.12 ± 0.0044 |
| Eucalyptus 40°C, 3.5 h   | 35.90 ± 0.01  | 23.45 ± 0.014 | 0.13 ± 0.0098 |
| Eucalyptus 40°C, 24 h    | 36.12 ± 0.016 | 24.00 ± 0.012 | 0.14 ± 0.0052 |
| Orange RAW               | 34.36 ± 0.019 | 24.71 ± 0.62  | 4.078 ± 0.018 |
| Orange 70°C, 15 min      | 29.95 ± 0.011 | 22.30 ± 0.002 | 3.55 ± 0.195  |
| Orange 70°C, 120 min     | 35.28 ± 0.029 | 26.03 ± 0.02  | 4.32 ± 0.0052 |
| Orange 40°C, 3.5 h       | 35.30 ± 0.012 | 26.15 ± 0.021 | 4.43 ± 0.012  |
| Orange 40°C; 24 h        | 32.72 ± 0.011 | 23.99 ± 0.59  | 3.80 ± 0.015  |

Table S3. Accuracy and precision of honey classification after heat treatment.

| Sample                                 | Overall accuracy | Average precision |
|----------------------------------------|------------------|-------------------|
| Acacia honey heated up to 40°C         | 0.815            | 0.824             |
| Acacia honey heated up to 70°C         | 0.868            | 0.877             |
| Eucalyptus honey heated up to 40°C     | 0.895            | 0.922             |
| Eucalyptus honey heated up to 70°C     | 0.947            | 0.958             |
| Orange blossom honey heated up to 40°C | 0.873            | 0.864             |
| Orange blossom honey heated up to 70°C | 0.922            | 0.917             |
